# Supplementary material for: Maternal Characteristics Affect Fetal Growth Response in the Women First Preconception Nutrition Trial
Source: MDPI journal article supplement (doi:10.3390/nu11102534), 2019-10-21
Supplement: s1 [file s1]

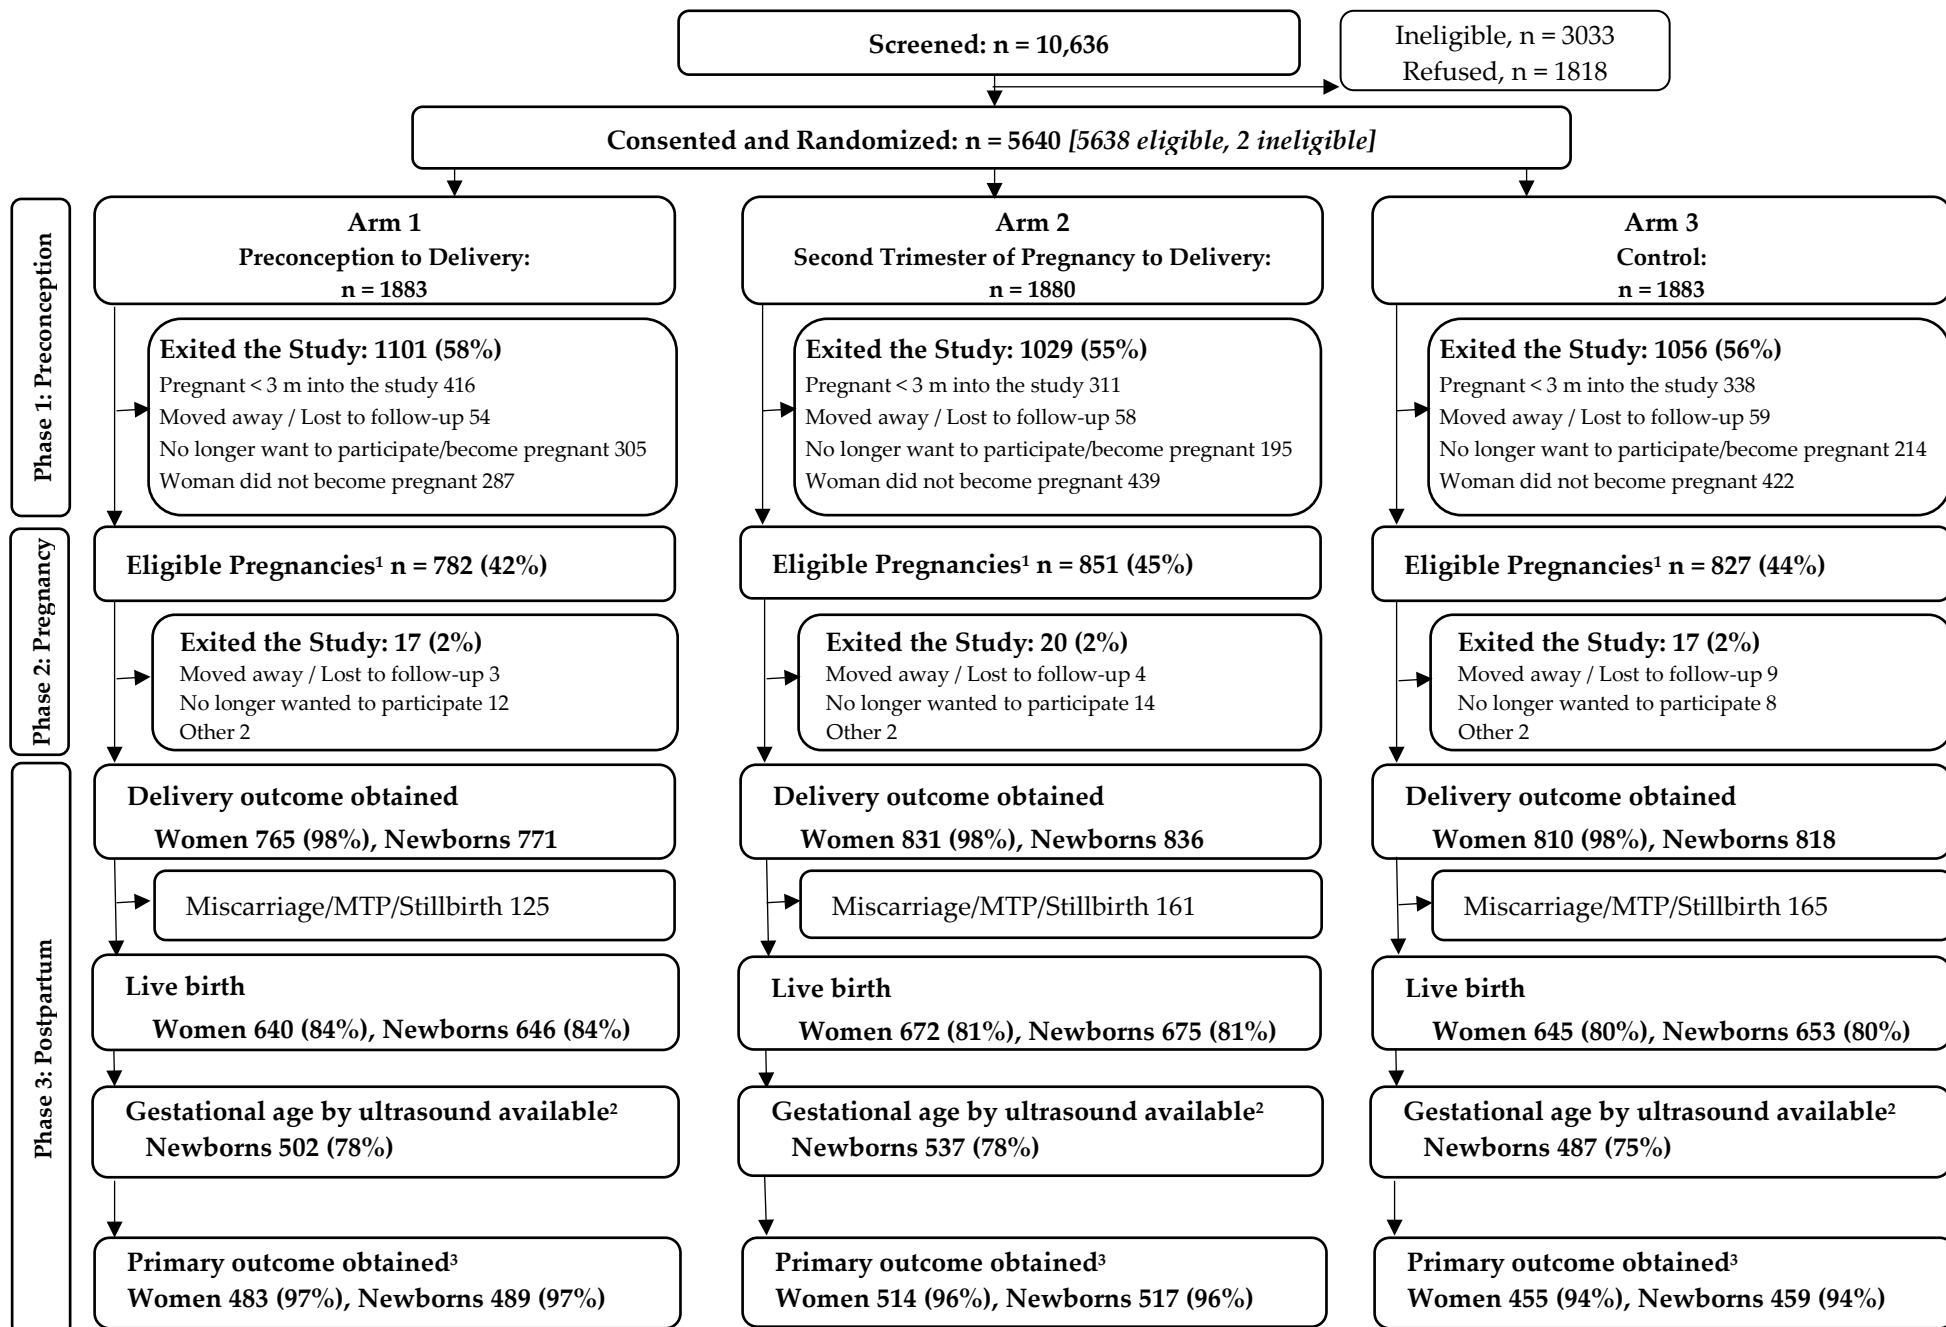

**Supplementary Figure 1.** CONSORT diagram for Women First Maternal Preconception Nutrition Trial, including participants from Guatemala, India, and Pakistan. Overall screening, random assignment, gestational age availability and obtainment of primary outcome by treatment arm.

<sup>1</sup>Percentage of those randomly assigned. Excludes women who became pregnant <3 mo into the study. The women who had eligible pregnancies may have had delivery data obtained or they may have exited the study before delivery.

<sup>2</sup>GA at birth is defined as the age at the time of the ultrasound based on the ultrasound plus time until birth if the ultrasound was done between 6 wk +0 d and 13 wk +6 d and the GA at birth was between 24 wk +0 d and 42 wk +6 d. If the ultrasound was not conducted during the GA previously mentioned, then the GA at birth is missing.

<sup>3</sup>Primary outcome was obtained for live newborns with 3 length measurements taken within 48 h of delivery. Among women, primary outcome obtained from  $\geq 1$  infants of the woman.

CONSORT, Consolidated Standards of Reporting Trials; GA, gestational age; MTP, medical termination of pregnancy.

## Online Supporting Material

**Supplemental Table 1: Descriptive subgroup analysis by parity and body mass index (BMI)**

| Outcome Subgroup                              | Arm 1 |                  | Arm 2 |                  | Arm 3 |                  | Arm 1 vs. 3 | Arm 2 vs. 3 | Arm 1 vs. 2 |
|-----------------------------------------------|-------|------------------|-------|------------------|-------|------------------|-------------|-------------|-------------|
|                                               | N     | Mean $\pm$ SD    | N     | Mean $\pm$ SD    | N     | Mean $\pm$ SD    | P-value     | P-value     | P-value     |
| <b>Length-for-age Z-score</b>                 |       |                  |       |                  |       |                  |             |             |             |
| Parity = 0: Normal/High BMI                   | 77    | -0.74 $\pm$ 1.06 | 63    | -0.82 $\pm$ 1.20 | 56    | -1.11 $\pm$ 0.99 | 0.057       | 0.149       | 0.680       |
| Parity = 0: Low BMI <sup>1</sup>              | 46    | -0.68 $\pm$ 1.00 | 34    | -1.00 $\pm$ 1.15 | 28    | -1.62 $\pm$ 1.19 | < 0.001     | 0.027       | 0.205       |
| Parity $\geq$ 0: Normal/High BMI              | 287   | -0.64 $\pm$ 0.97 | 323   | -0.60 $\pm$ 1.00 | 290   | -0.77 $\pm$ 0.98 | 0.111       | 0.027       | 0.566       |
| Parity $\geq$ 0: Low BMI                      | 79    | -0.81 $\pm$ 0.86 | 95    | -0.82 $\pm$ 1.09 | 85    | -0.87 $\pm$ 1.09 | 0.699       | 0.751       | 0.931       |
| <b>Weight-for-age Z-score</b>                 |       |                  |       |                  |       |                  |             |             |             |
| Parity = 0: Normal/High BMI                   | 77    | -1.01 $\pm$ 1.00 | 63    | -1.24 $\pm$ 1.07 | 56    | -1.33 $\pm$ 0.93 | 0.077       | 0.647       | 0.181       |
| Parity = 0: Low BMI                           | 46    | -1.16 $\pm$ 1.00 | 34    | -1.63 $\pm$ 0.89 | 28    | -1.85 $\pm$ 0.80 | 0.002       | 0.345       | 0.026       |
| Parity $\geq$ 0: Normal/High BMI              | 287   | -0.77 $\pm$ 0.89 | 323   | -0.75 $\pm$ 0.90 | 290   | -0.90 $\pm$ 0.83 | 0.064       | 0.029       | 0.779       |
| Parity $\geq$ 0: Low BMI                      | 79    | -1.12 $\pm$ 0.88 | 96    | -1.21 $\pm$ 0.76 | 85    | -1.16 $\pm$ 1.09 | 0.804       | 0.701       | 0.528       |
| <b>Weight to length ratio-for age Z-score</b> |       |                  |       |                  |       |                  |             |             |             |
| Parity = 0: Normal/High BMI                   | 77    | -1.45 $\pm$ 1.47 | 62    | -1.74 $\pm$ 1.39 | 55    | -1.81 $\pm$ 1.41 | 0.159       | 0.796       | 0.239       |
| Parity = 0: Low BMI                           | 44    | -1.62 $\pm$ 1.37 | 34    | -2.44 $\pm$ 1.20 | 27    | -2.43 $\pm$ 1.25 | 0.011       | 0.979       | 0.006       |
| Parity $\geq$ 0: Normal/High BMI              | 286   | -1.03 $\pm$ 1.29 | 321   | -0.98 $\pm$ 1.25 | 288   | -1.20 $\pm$ 1.14 | 0.096       | 0.033       | 0.676       |
| Parity $\geq$ 0: Low BMI                      | 77    | -1.51 $\pm$ 1.24 | 96    | -1.73 $\pm$ 1.10 | 85    | -1.65 $\pm$ 1.56 | 0.493       | 0.690       | 0.275       |

For each subgroup, treatment arms were compared within a linear regression model, using contrast statements.

<sup>1</sup>Low BMI defined as < 18.5 kg/m<sup>2</sup>.

## Online Supporting Material

**Supplemental Table 2. Regression results of neonatal anthropometry by newborn sex: combined sites**

|                                        | Arm 1                     | Arm 2                     | Arm 3                     | Sex x Arm                      | Arm 1 v Arm 3                           |                 | Arm 2 v Arm 3                           |                 | Arm 1 v Arm 2                           |                 |
|----------------------------------------|---------------------------|---------------------------|---------------------------|--------------------------------|-----------------------------------------|-----------------|-----------------------------------------|-----------------|-----------------------------------------|-----------------|
| Outcome                                | Adjusted Mean<br>(95% CI) | Adjusted Mean<br>(95% CI) | Adjusted Mean<br>(95% CI) | Interaction<br><i>P</i> -value | Adjusted Mean<br>Difference<br>(95% CI) | <i>P</i> -Value | Adjusted Mean<br>Difference<br>(95% CI) | <i>P</i> -Value | Adjusted Mean<br>Difference<br>(95% CI) | <i>P</i> -Value |
| Length-for-age Z-score                 |                           |                           |                           |                                |                                         |                 |                                         |                 |                                         |                 |
| Female                                 | -0.78 (-0.92, -0.63)      | -0.88 (-1.02, -0.74)      | -0.95 (-1.10, -0.80)      | 0.071                          | 0.17 (-0.01, 0.35)                      | 0.066           | 0.06 (-0.12, 0.24)                      | 0.498           | 0.11 (-0.07, 0.28)                      | 0.223           |
| Male                                   | -0.67 (-0.82, -0.53)      | -0.60 (-0.74, -0.45)      | -0.95 (-1.10, -0.80)      |                                | 0.28 (0.09, 0.46)                       | 0.003           | 0.35 (0.17, 0.54)                       | < 0.001         | -0.08 (-0.26, 0.10)                     | 0.386           |
| Weight-for-age Z-score                 |                           |                           |                           |                                |                                         |                 |                                         |                 |                                         |                 |
| Female                                 | -0.98 (-1.10, -0.85)      | -1.14 (-1.26, -1.02)      | -1.12 (-1.25, -0.99)      | 0.028                          | 0.14 (-0.02, 0.30)                      | 0.086           | -0.03 (-0.18, 0.13)                     | 0.757           | 0.17 (0.01, 0.32)                       | 0.035           |
| Male                                   | -0.91 (-1.03, -0.78)      | -0.89 (-1.01, -0.76)      | -1.17 (-1.30, -1.04)      |                                | 0.26 (0.10, 0.43)                       | 0.002           | 0.28 (0.12, 0.44)                       | 0.001           | -0.02 (-0.18, 0.14)                     | 0.815           |
| Weight to length ratio-for age Z-score |                           |                           |                           |                                |                                         |                 |                                         |                 |                                         |                 |
| Female                                 | -1.33 (-1.50, -1.15)      | -1.56 (-1.73, -1.38)      | -1.51 (-1.70, -1.32)      | 0.052                          | 0.18 (-0.05, 0.41)                      | 0.117           | -0.05 (-0.27, 0.18)                     | 0.678           | 0.23 (0.01, 0.45)                       | 0.039           |
| Male                                   | -1.25 (-1.43, -1.07)      | -1.24 (-1.42, -1.06)      | -1.59 (-1.78, -1.40)      |                                | 0.34 (0.11, 0.57)                       | 0.004           | 0.34 (0.12, 0.57)                       | 0.003           | -0.01 (-0.23, 0.22)                     | 0.951           |

Regression model controls for site, study arm, parity, age < 20 years, anemia (hemoglobin < 12 mg/dL), low BMI (< 18.5 kg/m<sup>2</sup>), no formal education, newborn sex, and low household socioeconomic status (SES). The SES tally provides the number of indicators available from the following list: electricity, improved water source, sanitation, man-made flooring, improved cooking fuels, and household assets. Low SES is defined as having ≤ 2 SES indicators present. CI, confidence interval.
